# Supplementary material for: Clinical evidence requirements according to the IVDR 2017/746: practical tools and references for underpinning clinical evidence of IVD-MDs
Source: publisher site journal article supplement (doi:10.1515/cclm-2022-1252), 2023-03-15
Supplement: Supplementary file 1 [file j_cclm-2022-1252_suppl_003.docx]

| **A. LIST OF CHAPTERS** | **Chap.** | **Articles** |
| --- | --- | --- |
| Introductory provisions | I | 1 – 4 |
| Making available on the market and putting into service of devices, obligations of economic operators, CE marking, free movement | II | 5 – 21 |
| Requirements regarding information supplied with the device | III | 22 – 30 |
| Notified bodies | IV | 31 – 46 |
| Classification and conformity assessment | V | 47 – 55 |
| Clinical evidence, performance evaluation and performance studies | VI | 56 – 77 |
| Post-market surveillance, vigilance and market surveillance | VII | 78 – 95 |
| Cooperation between member states, medical device coordination group, EU reference laboratories and device registers | VIII | 96 – 101 |
| Confidentiality, data protection, funding and penalties | IX | 102 – 106 |
| Final provisions | X | 107 – 113 |
| **B. LIST OF ANNEX** | | **Annex** |
| General safety and performance requirements | | I |
| Technical documentation | | II |
| Technical documentation on post-market surveillance | | III |
| EU declaration of conformity | | IV |
| CE marking of conformity | | V |
| Information to be submitted upon the registration of devices and economic operators in accordance with articles 26(3) and 28, core data elements to be provided to the UDI database together with the UDI-DI in accordance with articles 25 and 26 and the UDI system | | VI |
| Requirements to be met by notified bodies | | VII |
| Classification rules | | VIII |
| Conformity assessment based on a quality management system and on assessment of technical documentation | | IX |
| Conformity assessment based on type-examination | | X |
| Conformity assessment based on production quality assurance | | XI |
| Certificates issued by a notified body | | XII |
| Performance evaluation, performance studies and post-market performance follow-up | | XIII |
| Interventional clinical performance studies and certain other performance studies | | XIV |
| Correlation table (directive 98/79/CE) | | XV |

Supplemental table 1: Rapid overview of IVDR content with the list of the ten chapters (A) and the list of the fifteen annexes (B). Chapter VI, annexes XIII and XIV particularly focus on performance evaluation.
